# Supplementary material
Source: publisher site journal article supplement (https://www.dovepress.com/article/439106)
Supplement: Supplementary file 1 [file get_supplementary_file.php]

| Type of Exercise | Frequency (times/month) | Average duration each time (minutes) |
| --- | --- | --- |
| Walking |  |  |
| Climbing stairs |  |  |
| Mopping the floor |  |  |
| Cleaning the table |  |  |
| Hand washing clothes |  |  |
| Tidy the room |  |  |
| Quick walking/Shopping |  |  |
| Cycling to work |  |  |
| Tai Chi Boxing |  |  |
| Square dancing |  |  |
| Practicing yoga |  |  |
| Soft gymnastics |  |  |
| Shoulder and neck stretching |  |  |
| Stretching action |  |  |
| Cycling on a flat surface |  |  |
| Aerobic dancing |  |  |
| Fitness exercises |  |  |
| Swimming |  |  |
| Exercise bands |  |  |
| Dumbbell |  |  |

**Supplementary Table. The frequency and duration of moderate-intensity physical exercise**
